# Supplementary material for: Mitochondrial DNA Mutations Induce Mitochondrial Dysfunction, Apoptosis and Sarcopenia in Skeletal Muscle of Mitochondrial DNA Mutator Mice
Source: PLoS One. 2010 Jul 7;5(7):e11468. doi: 10.1371/journal.pone.0011468 (PMC2898813; doi:10.1371/journal.pone.0011468)
Supplement: Table S1 — Gene expression changes in gastrocnemius muscle of 13-month-old D257A mice compared to wild type mice. (0.03 MB XLS) [file pone.0011468.s001.xls]

## Sheet: PLoS ONE Supporting Table 1
Table S1: Gene expression changes in 13-month-old D257A mice.
Probe Set ID	Gene Symbol	P Value	FDR	Fold Change
1429625_at	2900054C01Rik	0.000114	0.0352557	-1.74
1450972_at	3110040N11Rik	0.000149	0.0399269	-1.6
1436219_at	4933403F05Rik	0.000169	0.0418592	-1.37
1435745_at	5031439G07Rik	2.56e-05	0.0178737	-1.51
1434756_at	5430421B17	8.51e-05	0.0322698	1.71
1432014_at	6530409C15Rik	8.49e-05	0.0322698	-2.77
1456081_a_at	Aacs	9.16e-05	0.0322698	6.78
1416679_at	Abcd3	2.49e-05	0.0178737	-1.5
1434185_at	Acaca	7.99e-05	0.0322698	2.12
1415984_at	Acadm	0.0002	0.0461806	-1.43
1449573_at	Alpk3	1.22e-05	0.0172066	-4.45
1417765_a_at	Amy1	1.81e-06	0.00726378	1.46
1436577_at	Arhgef9	2.6e-05	0.0178737	-1.99
1419028_at	Arpp21	9.88e-05	0.0324926	-1.45
1451095_at	Asns	1.43e-05	0.0172066	1.92
1439036_a_at	Atp1b1	8.2e-05	0.0322698	-1.87
1422525_at	Atp5k	0.0001	0.0324926	-1.17
1452257_at	Bdh1	2.34e-05	0.0178737	-3.58
1423833_a_at	Brp44	4.79e-05	0.0240084	-1.34
1453651_a_at	Brp44l	4.91e-06	0.0123006	-1.38
1436168_at	C730029A08Rik	1.42e-05	0.0172066	-1.74
1418509_at	Cbr2	0.000135	0.0391186	-2.68
1426183_a_at	Cd209d	7.05e-05	0.031417	2.49
1420582_at	Cd209e	1.09e-06	0.00726378	4.14
1417599_at	Cd276	5.38e-05	0.0263379	-2.32
1428722_at	Ckmt2	1.86e-07	0.00373175	-1.7
1451322_at	Cmbl	2.98e-06	0.00880333	1.86
1443170_at	Cnnm1	3.91e-05	0.0202474	-1.63
1452867_at	Col4a3bp	0.000149	0.0399269	1.48
1448322_a_at	Cox4i1	9.91e-06	0.0165549	-1.2
1418709_at	Cox7a1	2e-05	0.0178737	-1.66
1429618_at	Cyld	5.57e-05	0.0265851	-1.39
1419070_at	Cys1	2.85e-05	0.0178737	-1.57
1418944_at	Cysltr1	0.000232	0.0496737	1.7
1437866_at	Dusp18	0.000206	0.046845	-2.77
1454878_at	Dzip3	0.000211	0.0475442	-1.85
1439480_at	ENSMUSG00000075545	0.000189	0.0448306	-3.55
1436299_at	Gls	0.000107	0.0334151	-1.38
1423878_at	Gypc	3.9e-05	0.0202474	1.39
1428692_at	Hddc3	2.13e-05	0.0178737	9.65
1451511_at	Hibch	0.0001	0.0324926	-1.9
1448180_a_at	Hn1	2.51e-05	0.0178737	3.69
1424367_a_at	Homer2	0.000236	0.0496737	-1.82
1436332_at	Hspb6	3.07e-06	0.00880333	-1.48
1416789_at	Idh3g	8.89e-05	0.0322698	-1.28
1425385_a_at	Igh	6.4e-06	0.0128284	-4.02
1452356_at	Iqcc	3.9e-05	0.0202474	-1.46
1418517_at	Irx3	8.45e-05	0.0322698	-2.88
1429558_a_at	Larp7	8.83e-05	0.0322698	-1.68
1428614_at	Ldhd	9.25e-05	0.0322698	-2.2
1426808_at	Lgals3	0.000224	0.0496737	2.28
1415904_at	Lpl	0.000177	0.0432034	-1.39
1455314_at	Lpp	0.000196	0.0458015	1.55
1451203_at	Mb	7.54e-05	0.0322698	-1.34
1448172_at	Mdh1	5.74e-06	0.0127891	-1.48
1451042_a_at	Mina	1.54e-05	0.0172066	-1.54
1418915_at	Mmachc	0.000229	0.0496737	-1.54
1423242_at	Mrps36	3.47e-05	0.0202474	-1.65
1448856_a_at	Msra	8.77e-05	0.0322698	-1.53
1419487_at	Mybph	0.000144	0.0396818	3.24
1450468_at	Myoc	2.52e-05	0.0178737	-2.1
1423692_at	Ndufa8	2.21e-05	0.0178737	-1.33
1448589_at	Ndufb5	1.9e-05	0.0178737	-1.3
1425143_a_at	Ndufs1	2.19e-05	0.0178737	-1.37
1449059_a_at	Oxct1	0.000118	0.0353844	-2.21
1441254_at	Pard3b	0.000158	0.0408951	-1.4
1451405_at	Pcca	6.83e-05	0.0311125	-2
1452913_at	Pcp4l1	0.000238	0.0496737	-3.69
1453839_a_at	Pi16	9.55e-06	0.0165549	-4.98
1416939_at	Ppa1	0.000163	0.0408951	-1.44
1448233_at	Prnp	2.81e-05	0.0178737	-1.76
1455450_at	Ptpn3	0.000233	0.0496737	-1.98
1422541_at	Ptprm	0.00014	0.0396195	-1.23
1417073_a_at	Qk	7.58e-05	0.0322698	-1.54
1418837_at	Qprt	0.000138	0.0395138	3.37
1449461_at	Rbp7	0.000105	0.0334151	2.51
1428696_at	Rftn1	0.000142	0.0396367	-1.54
1424505_at	Rmnd1	3.73e-05	0.0202474	-1.46
1454859_a_at	Rpl23	0.00024	0.0496737	1.32
1448785_at	Runx1t1	0.000159	0.0408951	2.22
1423025_a_at	Schip1	3.54e-05	0.0202474	-1.82
1416300_a_at	Slc25a3	0.000118	0.0353844	-1.15
1438673_at	Slc4a7	3.94e-05	0.0202474	-1.69
1419145_at	Smtnl1	0.00019	0.0448306	-2.36
1417633_at	Sod3	1.29e-06	0.00726378	-2.31
1416564_at	Sox7	6.73e-05	0.0311125	-1.53
1425534_at	Stau2	1.48e-05	0.0172066	-2.33
1448033_at	Tatdn1	1.57e-06	0.00726378	-1.5
1452942_at	Tmem65	1.34e-05	0.0172066	-1.7
1455333_at	Tns3	0.000157	0.0408951	-1.37
1418587_at	Traf3	0.000229	0.0496737	-2.5
1426956_a_at	Trp53bp1	9.33e-05	0.0322698	-2.04
1427114_at	Ttc19	9.62e-05	0.0324926	-1.67
1452985_at	Uaca	0.000129	0.0379521	-1.69
1428631_a_at	Uqcrc2	2.75e-05	0.0178737	-1.32
1448411_at	Wfs1	0.000162	0.0408951	-2.55
1455301_at	Wipf3	0.000186	0.0448306	-1.45
FDR, false discovery rate; Fold change is relative to expression levels in gastrocnemius
muscle of 13-month-old WT mice.
